# Supplementary material for: Association of Aggresomes with Survival Outcomes in Pediatric Medulloblastoma
Source: PubMed Central journal article supplement (PMC6717208; doi:10.1038/s41598-019-49027-x), 2019-08-30
Supplement: 41598_2019_49027_MOESM1_ESM.pdf [file 41598_2019_49027_MOESM1_ESM.pdf]

# Association of Aggresomes with Survival Outcomes in Pediatric Medulloblastoma

## Authors

Maha Yehia <sup>1, 15 \*</sup>, Hala Taha <sup>1, 9 \*</sup>, Asmaa Salama <sup>1, 9</sup>, Nada Amer <sup>2</sup>, Amal Mosaab <sup>2</sup>, Omneya Hassanain <sup>3</sup>, Amal Refaat <sup>4, 10</sup>, Dina Yassin <sup>5, 11</sup>, Ahmed El-Hemaly <sup>6, 12</sup>, Soha Ahmed <sup>7, 13</sup>, Mohamed El-Beltagy <sup>8, 14</sup>, Osama Shaalan <sup>15</sup> and Shahenda El-Naggar <sup>2</sup>

## Affiliations

<sup>1</sup>Department of Pathology, Children's Cancer Hospital Egypt 57357, Cairo, Egypt, <sup>2</sup>Tumor Biology Research Program, Basic Research Unit, Department of Research, Children's Cancer Hospital Egypt 57357, Cairo, Egypt, <sup>3</sup>Clinical Research Unit, Department of Research, Children's Cancer Hospital Egypt 57357, Cairo, Egypt, <sup>4</sup>Department of Radiology, Children's Cancer Hospital Egypt 57357, Cairo, Egypt, <sup>5</sup>Laboratory of Molecular Biology, Department of Clinical Pathology, Children's Cancer Hospital Egypt 57357, Cairo, Egypt, <sup>6</sup>Department of Pediatric Oncology, Children's Cancer Hospital Egypt 57357, Cairo, Egypt, <sup>7</sup>Department of Radiotherapy, Children's Cancer Hospital Egypt 57357, Cairo, Egypt, <sup>8</sup>Department of Neurosurgery, Children's Cancer Hospital Egypt 57357, Cairo, Egypt, <sup>9</sup>Department of Pathology, National Cancer Institute, Cairo University, Cairo, Egypt, <sup>10</sup>Department of Radiology, National Cancer Institute, Cairo University, Cairo, Egypt, <sup>11</sup>Department of Clinical Pathology, National Cancer Institute, Cairo University, Cairo, Egypt, <sup>12</sup>Department of Pediatric Oncology, National Cancer Institute, Cairo University, Cairo, Egypt, <sup>13</sup>Department of Clinical Oncology, Faculty of Medicine, Aswan University, Aswan, Egypt, <sup>14</sup>Department of Neurosurgery, Faculty of Medicine, Cairo University, Cairo, Egypt, <sup>15</sup>Department of Molecular Diagnostics, Genetic Engineering and Biotechnology Research Institute, University of Sadat City, Menoufia, Egypt

\* Maha Yehia and Hala Taha are co-first authors

Correspondence: Dr. Shahenda Mohamed El-Naggar, E-mail address: [shahenda.elnaggar@57357.org](mailto:shahenda.elnaggar@57357.org)

Research Department, Children's Cancer Hospital Egypt 57357, 1 Seket Al-Emam Street, Cairo, P.O box 11441,  
Egypt.

# Supplementary Figure. 1

A

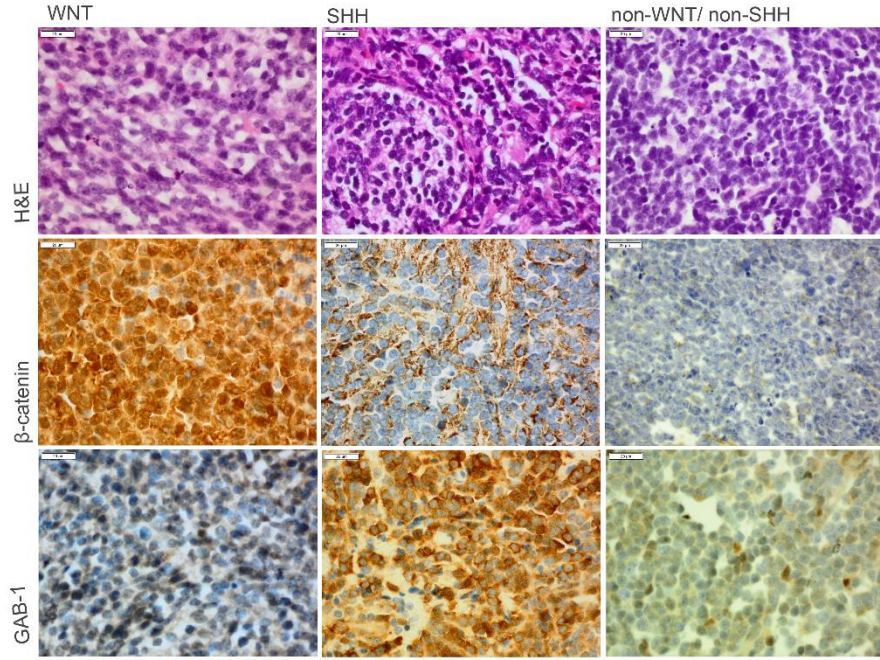

B

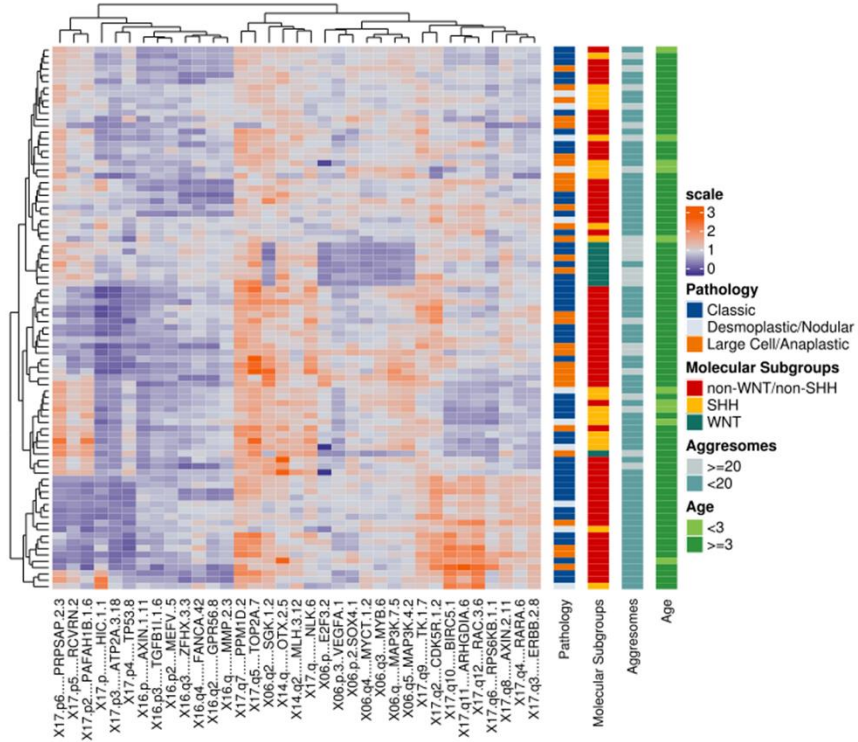

Supplementary Figure. 2

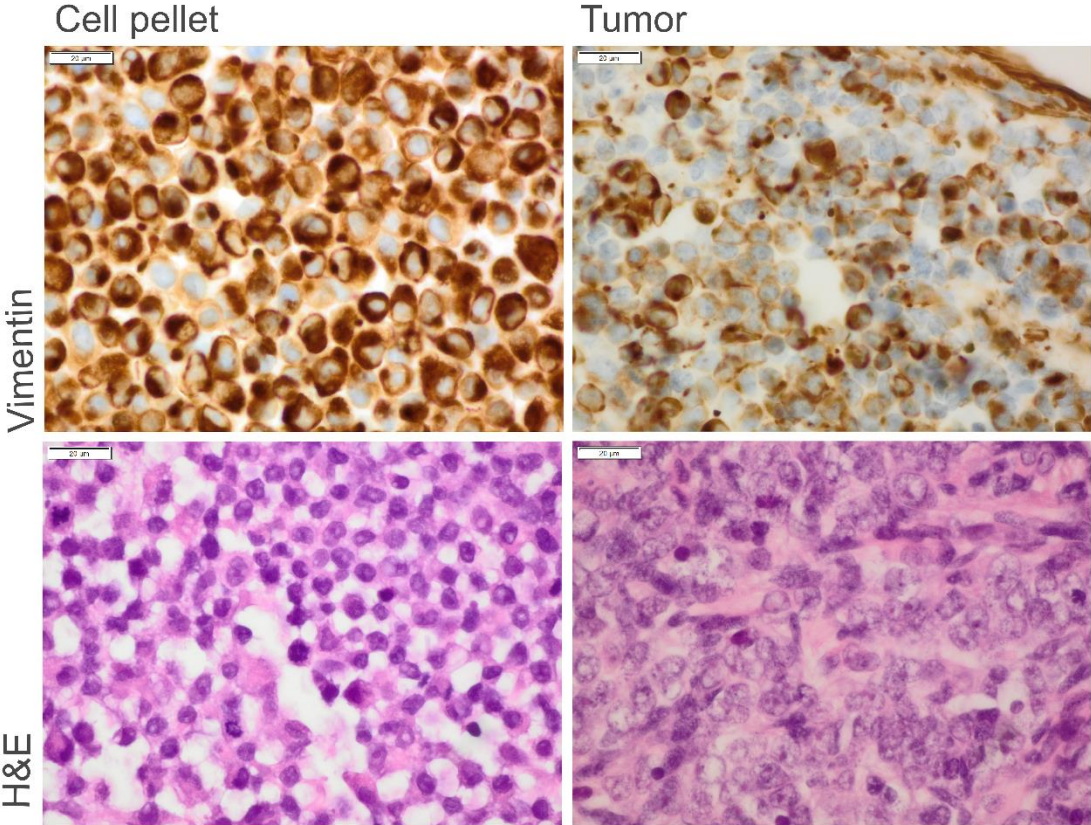

### Supplementary Figure. 3

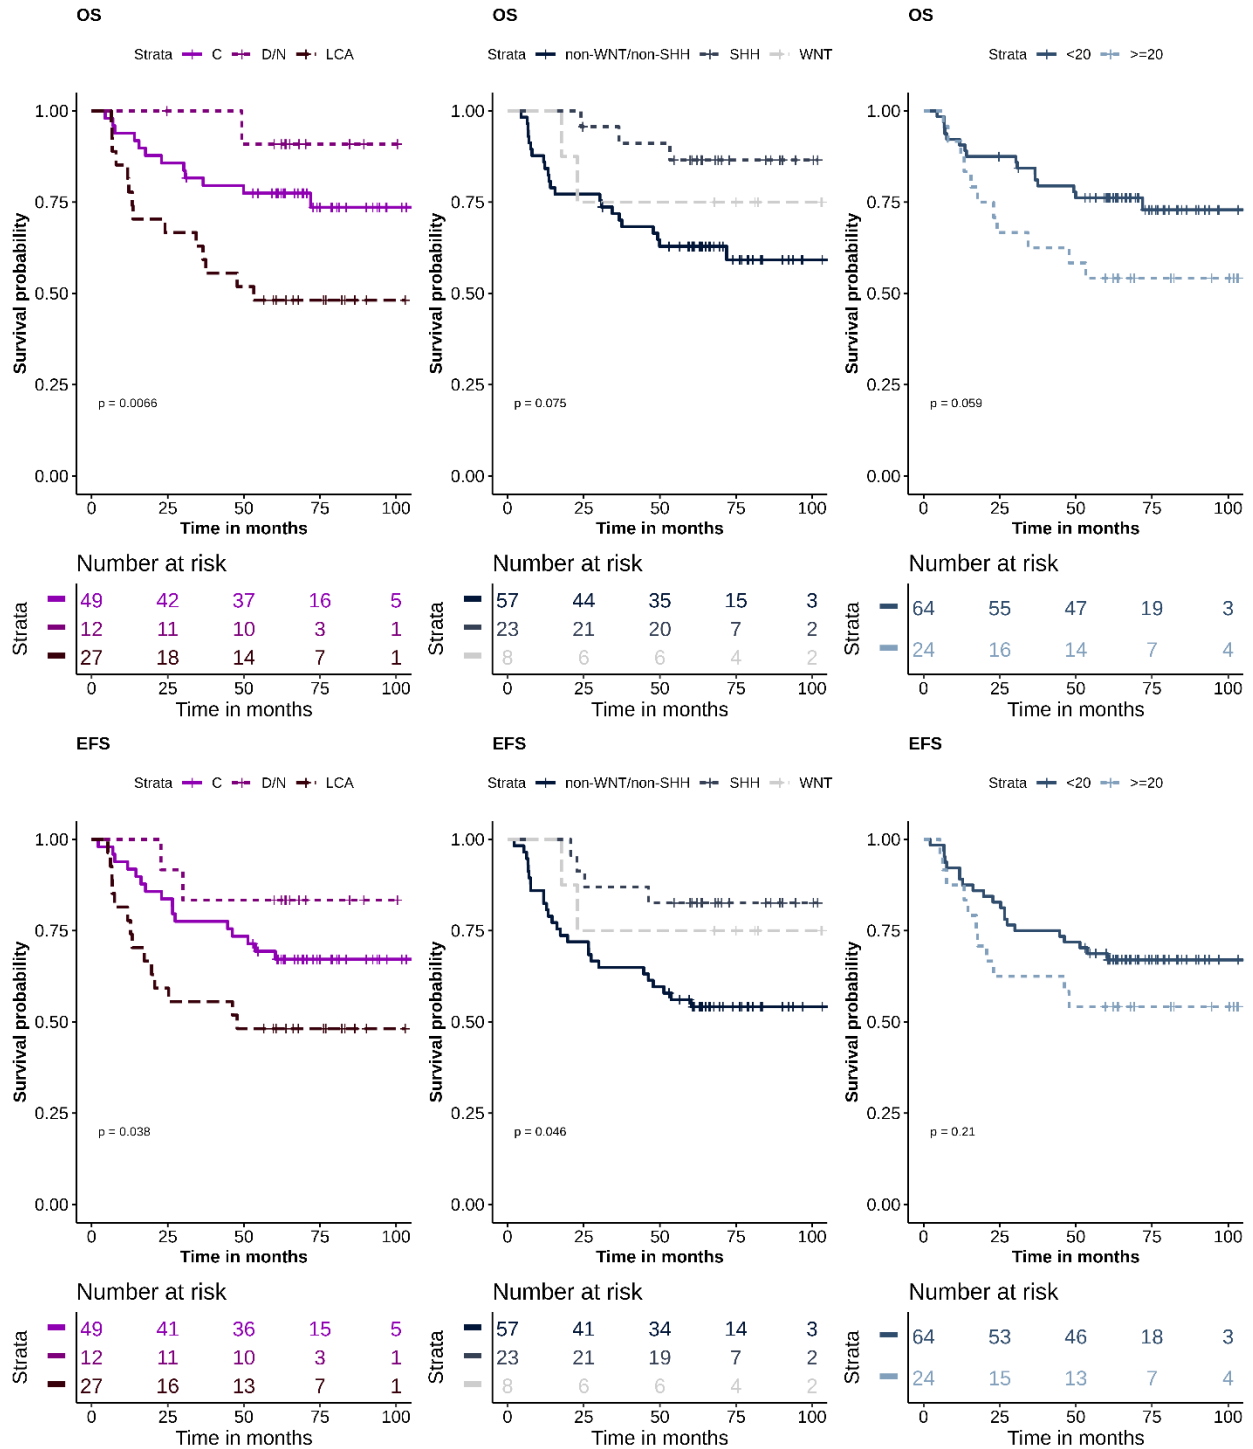

# Supplementary Figure. 4

**A**

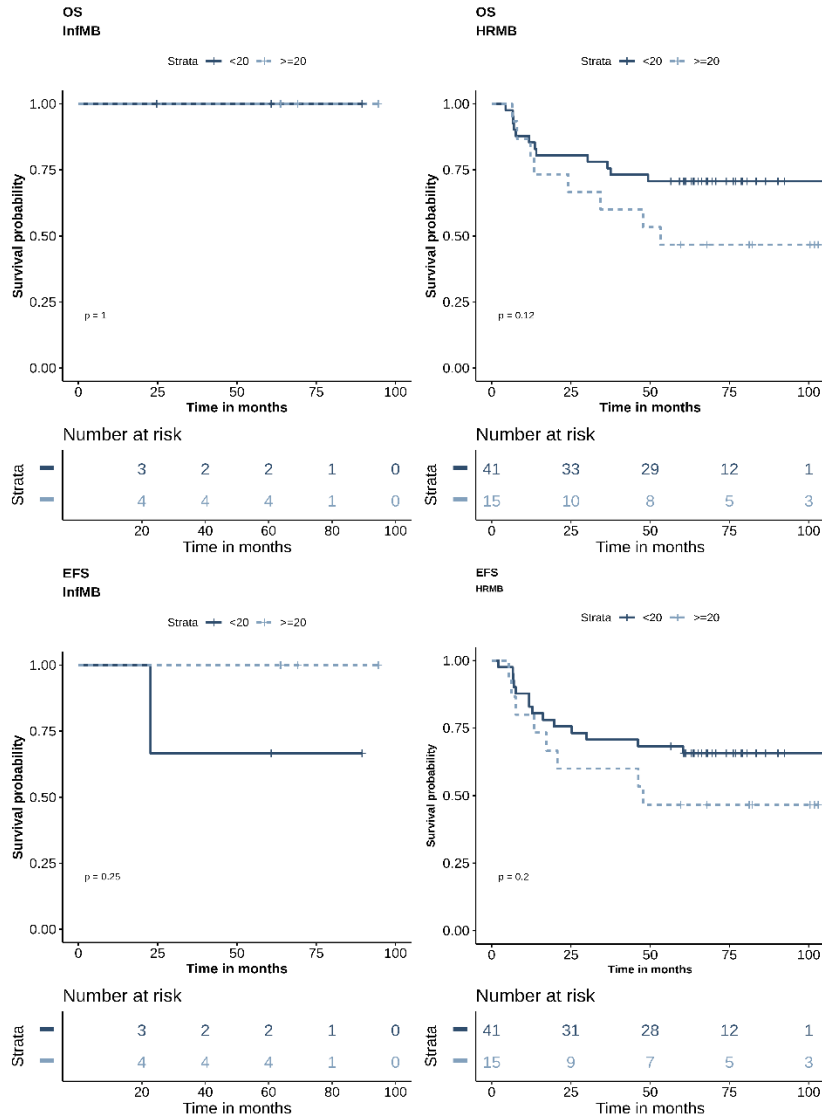

**B**

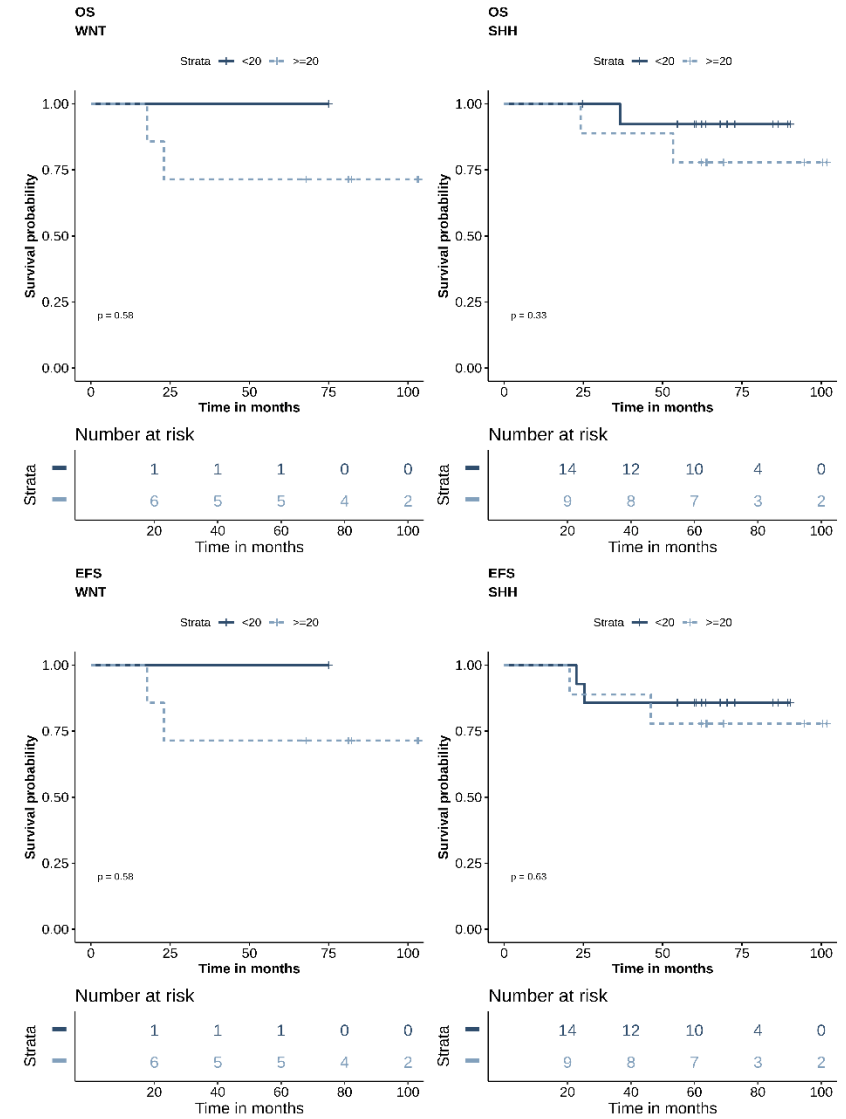

## Supplementary Figure Legends

**Supplementary Fig. 1.** Stratification of medulloblastoma molecular subgroups. (A) Histologic evaluation was performed using H&E stained section. Nuclear  $\beta$ -catenin and cytoplasmic GAB-1 immunoreactivity were used as markers for WNT and SHH molecular subgroups respectively. Non-WNT/non-SHH subgroup were identified using cytoplasmic  $\beta$ -catenin and negative GAB-1 immunostaining; (B) Heatmap representation of MLPA DQ results. Clinicopathological and molecular annotations are provided as side bars according to the included key.

**Supplementary Fig. 2.** Immunohistochemical analysis of CCHE-188 cell pellet and the original tumor. Aggresomes are identified by the formation of juxta nuclear localization of vimentin in both cell line and tumor.

**Supplementary Fig. 3.** Survival analysis Kaplan-Meier plot of overall and event-free survival. Survival analysis separated by histological variants, molecular subgroups and percentage of aggresomes within the tumor ( $\geq 20\%$  and  $< 20\%$ ). Survival probability (y axis) and time indicated in months (x axis). *P-values* were calculated using the log-rank test.

**Supplementary Fig. 4.** Survival analysis Kaplan-Meier according to percentage of aggresomes within the tumor cells. (A) Patients are stratified according to clinicopathological risk criteria (InfMB and HRMB). (B) Patients are stratified using molecular subgrouping (WNT and SHH). Survival probability (y axis) and time indicated in months (x axis). *P-values* were calculated using the log-rank test.

**Supplementary Table 1**

| <b>ID</b>    | <b>Gender</b> | <b>Pathology</b>      | <b>β-catenin</b> | <b>GAB1</b> | <b>YAP1</b> | <b>M-subgroup</b> | <b>Vimentin</b> | <b>Aggresomes</b> | <b>M_Status</b> | <b>Treatment protocol</b> |
|--------------|---------------|-----------------------|------------------|-------------|-------------|-------------------|-----------------|-------------------|-----------------|---------------------------|
| CCHE_Med_001 | M             | Classic               | N                | N           | N/A         | nonWnt/SHH        | P               | N                 | M0              | HRMB (CCHE 3-1-2008)      |
| CCHE_Med_002 | M             | Classic               | N                | N           | N/A         | nonWnt/SHH        | N               | N                 | M0              | SRMB (CCHE 3-1-2008)      |
| CCHE_Med_003 | F             | Desmoplastic/Nodular  | N                | 90%         | N/A         | SHH               | P               | 75%               | M3              | HRMB (CCHE 3-1-2008)      |
| CCHE_Med_004 | F             | Classic               | N                | 15%         | N           | nonWnt/SHH        | N               | N                 | M1              | HRMB (CCHE 3-1-2008)      |
| CCHE_Med_005 | M             | Large_Cell_Anaplastic | P                | N           | N/A         | Wnt               | P               | 20%               | M0              | HRMB (CCHE 3-1-2008)      |
| CCHE_Med_006 | F             | Classic               | P                | N           | N/A         | Wnt               | P               | 30%               | M0              | SRMB (CCHE 3-1-2008)      |
| CCHE_Med_007 | M             | Classic               | N                | 25%         | N/A         | SHH               | P               | 85%               | M0              | HRMB (CCHE 3-1-2008)      |
| CCHE_Med_008 | M             | Large_Cell_Anaplastic | N                | N           | N/A         | nonWnt/SHH        | N               | N                 | Mx              | Surgery only              |
| CCHE_Med_009 | M             | Classic               | N                | N           | N/A         | nonWnt/SHH        | N               | N                 | M0              | SRMB (CCHE 3-1-2008)      |
| CCHE_Med_010 | M             | Large_Cell_Anaplastic | N                | N           | N/A         | nonWnt/SHH        | N               | N                 | Mx              | HRMB (CCHE 3-1-2008)      |
| CCHE_Med_011 | M             | Classic               | P                | N           | N/A         | Wnt               | P               | 60%               | M0              | SRMB (CCHE 3-1-2008)      |
| CCHE_Med_012 | F             | Large_Cell_Anaplastic | N                | N           | N/A         | nonWnt/SHH        | P               | 20%               | M0              | HRMB (CCHE 3-1-2008)      |
| CCHE_Med_014 | M             | Classic               | N                | N           | N/A         | nonWnt/SHH        | N               | N                 | M0              | SRMB (CCHE 3-1-2008)      |
| CCHE_Med_015 | M             | Classic               | N                | N           | N/A         | nonWnt/SHH        | P               | 7%                | M2              | HRMB (CCHE 3-1-2008)      |
| CCHE_Med_016 | F             | Classic               | N                | N           | N/A         | nonWnt/SHH        | N               | N                 | M0              | SRMB (CCHE 3-1-2008)      |
| CCHE_Med_017 | M             | Classic               | N                | N           | N/A         | nonWnt/SHH        | N               | N                 | M0              | SRMB (CCHE 3-1-2008)      |
| CCHE_Med_018 | M             | Large_Cell_Anaplastic | P                | N           | P           | Wnt               | P               | 60%               | M0              | HRMB (CCHE 3-1-2008)      |
| CCHE_Med_019 | M             | Classic               | N                | N           | N/A         | nonWnt/SHH        | N               | N                 | M1              | HRMB (CCHE 3-1-2008)      |
| CCHE_Med_020 | F             | Classic               | P                | N           | N/A         | Wnt               | P               | 70%               | M1              | HRMB (CCHE 3-1-2008)      |
| CCHE_Med_021 | F             | Large_Cell_Anaplastic | N                | N           | N/A         | nonWnt/SHH        | N               | N                 | M1              | HRMB (CCHE 3-1-2008)      |
| CCHE_Med_022 | F             | Large_Cell_Anaplastic | N                | 98%         | N/A         | SHH               | N               | 15%               | Mx              | HRMB (CCHE 3-1-2008)      |
| CCHE_Med_023 | F             | Large_Cell_Anaplastic | N                | 90%         | P           | SHH               | P               | 2%                | M0              | HRMB (CCHE 3-1-2008)      |
| CCHE_Med_024 | M             | Classic               | N                | N           | N/A         | nonWnt/SHH        | N               | N                 | M1              | HRMB (CCHE 3-1-2008)      |
| CCHE_Med_025 | F             | Classic               | N                | 75%         | N/A         | SHH               | P               | 90%               | M0              | InfMB (CCHE 3-1-2008)     |
| CCHE_Med_026 | M             | Desmoplastic/Nodular  | N                | 40%         | N/A         | SHH               | N               | 5%                | M0              | SRMB (CCHE 3-1-2008)      |
| CCHE_Med_027 | M             | Classic               | N                | N           | N/A         | nonWnt/SHH        | N               | N                 | Mx              | HRMB (CCHE 3-1-2008)      |
| CCHE_Med_028 | M             | Large_Cell_Anaplastic | N                | N           | N/A         | nonWnt/SHH        | N               | 10%               | M1              | HRMB (CCHE 3-1-2008)      |
| CCHE_Med_029 | M             | Desmoplastic/Nodular  | N                | 50%         | N/A         | SHH               | P               | 15%               | Mx              | InfMB (CCHE 3-1-2008)     |
| CCHE_Med_030 | M             | Classic               | N                | N           | N/A         | nonWnt/SHH        | N               | N                 | M1              | HRMB (CCHE 3-1-2008)      |
| CCHE_Med_031 | F             | Classic               | P                | N           | N/A         | Wnt               | P               | 20%               | M0              | SRMB (CCHE 3-1-2008)      |
| CCHE_Med_032 | M             | Classic               | N                | N           | N/A         | nonWnt/SHH        | P               | 5%                | M0              | SRMB (CCHE 3-1-2008)      |
| CCHE_Med_033 | M             | Large_Cell_Anaplastic | N                | 40%         | N/A         | SHH               | N               | 10%               | Mx              | HRMB (CCHE 3-1-2008)      |



|              |   |                       |   |     |     |            |   |     |    |                       |
|--------------|---|-----------------------|---|-----|-----|------------|---|-----|----|-----------------------|
| CCHE_Med_034 | F | Desmoplastic/Nodular  | N | N   | P   | SHH        | N | 1%  | M0 | InfMB (CCHE 3-1-2008) |
| CCHE_Med_035 | M | Large_Cell_Anaplastic | N | N   | N/A | nonWnt/SHH | P | 2%  | M1 | HRMB (CCHE 3-1-2008)  |
| CCHE_Med_036 | M | Large_Cell_Anaplastic | N | N   | N/A | nonWnt/SHH | P | 5%  | M0 | SRMB (CCHE 3-1-2008)  |
| CCHE_Med_038 | M | Classic               | N | N   | N/A | nonWnt/SHH | N | N   | M0 | SRMB (CCHE 3-1-2008)  |
| CCHE_Med_039 | M | Classic               | N | N   | N/A | nonWnt/SHH | P | 7%  | M0 | HRMB (CCHE 3-1-2008)  |
| CCHE_Med_040 | M | Classic               | N | N   | N/A | nonWnt/SHH | P | 25% | M0 | SRMB (CCHE 3-1-2008)  |
| CCHE_Med_041 | F | Large_Cell_Anaplastic | N | N   | N/A | nonWnt/SHH | P | 15% | M1 | HRMB (CCHE 3-1-2008)  |
| CCHE_Med_042 | F | Desmoplastic/Nodular  | N | 98% | N/A | SHH        | N | N   | M0 | SRMB (CCHE 3-1-2008)  |
| CCHE_Med_045 | F | Classic               | N | N   | N/A | nonWnt/SHH | N | N   | M0 | SRMB (CCHE 3-1-2008)  |
| CCHE_Med_046 | F | Large_Cell_Anaplastic | N | N   | N/A | nonWnt/SHH | N | N   | M1 | HRMB (CCHE 3-1-2008)  |
| CCHE_Med_047 | M | Classic               | N | N   | N/A | nonWnt/SHH | P | 5%  | M1 | HRMB (CCHE 3-1-2008)  |
| CCHE_Med_048 | M | Classic               | N | 2%  | N   | nonWnt/SHH | N | 2%  | M2 | HRMB (CCHE 3-1-2008)  |
| CCHE_Med_049 | M | Large_Cell_Anaplastic | N | N   | N/A | nonWnt/SHH | N | 1%  | M1 | HRMB (CCHE 3-1-2008)  |
| CCHE_Med_050 | M | Large_Cell_Anaplastic | N | N   | N/A | nonWnt/SHH | N | 2%  | M3 | HRMB (CCHE 3-1-2008)  |
| CCHE_Med_051 | M | Classic               | N | 90% | N/A | SHH        | N | 10% | M0 | SRMB (CCHE 3-1-2008)  |
| CCHE_Med_052 | F | Classic               | N | N   | N/A | nonWnt/SHH | N | 1%  | M0 | HRMB (CCHE 3-1-2008)  |
| CCHE_Med_053 | M | Classic               | P | N   | N/A | Wnt        | P | 10% | M0 | SRMB (CCHE 3-1-2008)  |
| CCHE_Med_054 | M | Classic               | N | N   | N/A | nonWnt/SHH | N | 1%  | M1 | HRMB (CCHE 3-1-2008)  |
| CCHE_Med_055 | M | Large_Cell_Anaplastic | N | N   | N/A | nonWnt/SHH | P | 20% | M0 | HRMB (CCHE 3-1-2008)  |
| CCHE_Med_056 | M | Classic               | N | N   | N/A | nonWnt/SHH | N | N   | M3 | Surgery only          |
| CCHE_Med_057 | F | Classic               | N | 25% | N/A | SHH        | P | N   | M0 | SRMB (CCHE 3-1-2008)  |
| CCHE_Med_058 | F | Large_Cell_Anaplastic | N | 80% | N/A | SHH        | P | 80% | M0 | HRMB (CCHE 3-1-2008)  |
| CCHE_Med_059 | M | Classic               | N | N   | N/A | nonWnt/SHH | N | N   | M0 | SRMB (CCHE 3-1-2008)  |
| CCHE_Med_060 | F | Large_Cell_Anaplastic | N | N   | N/A | nonWnt/SHH | N | 2%  | M0 | HRMB (CCHE 3-1-2008)  |
| CCHE_Med_061 | M | Large_Cell_Anaplastic | N | N   | N/A | nonWnt/SHH | N | N   | M0 | HRMB (CCHE 3-1-2008)  |
| CCHE_Med_062 | F | Large_Cell_Anaplastic | N | 85% | N/A | SHH        | P | 80% | M0 | HRMB (CCHE 3-1-2008)  |
| CCHE_Med_063 | F | Large_Cell_Anaplastic | N | N   | N/A | nonWnt/SHH | P | 20% | M3 | HRMB (CCHE 3-1-2008)  |
| CCHE_Med_065 | F | Desmoplastic/Nodular  | N | 25% | N/A | SHH        | N | N   | M0 | SRMB (CCHE 3-1-2008)  |
| CCHE_Med_066 | M | Classic               | N | N   | N/A | nonWnt/SHH | N | N   | M3 | HRMB (CCHE 3-1-2008)  |
| CCHE_Med_068 | F | Classic               | N | N   | N/A | nonWnt/SHH | N | N   | M2 | HRMB (CCHE 3-1-2008)  |
| CCHE_Med_069 | F | Classic               | N | N   | N/A | nonWnt/SHH | N | 5%  | M0 | HRMB (CCHE 3-1-2008)  |
| CCHE_Med_070 | F | Large_Cell_Anaplastic | N | N   | N/A | nonWnt/SHH | P | 70% | M0 | HRMB (CCHE 3-1-2008)  |
| CCHE_Med_071 | M | Classic               | N | N   | N/A | nonWnt/SHH | N | 5%  | M0 | HRMB (CCHE 3-1-2008)  |
| CCHE_Med_072 | M | Desmoplastic/Nodular  | N | N   | FWN | nonWnt/SHH | P | 1%  | M3 | HRMB (CCHE 3-1-2008)  |
| CCHE_Med_073 | M | Classic               | N | N   | N/A | nonWnt/SHH | P | 3%  | M3 | HRMB (CCHE 3-1-2008)  |

|              |   |                       |   |     |     |            |   |     |    |                       |
|--------------|---|-----------------------|---|-----|-----|------------|---|-----|----|-----------------------|
| CCHE_Med_074 | M | Large_Cell_Anaplastic | N | N   | N/A | nonWnt/SHH | N | N   | M1 | Surgery only          |
| CCHE_Med_075 | F | Desmoplastic/Nodular  | N | 40% | N/A | SHH        | P | 60% | M1 | InfMB (CCHE 3-1-2008) |
| CCHE_Med_077 | F | Classic               | N | 90% | N/A | SHH        | P | 80% | M0 | SRMB (CCHE 3-1-2008)  |
| CCHE_Med_078 | M | Large_Cell_Anaplastic | N | N   | N/A | nonWnt/SHH | P | 90% | M3 | HRMB (CCHE 3-1-2008)  |
| CCHE_Med_079 | F | Classic               | N | N   | N/A | nonWnt/SHH | N | N   | M0 | HRMB (CCHE 3-1-2008)  |
| CCHE_Med_080 | M | Large_Cell_Anaplastic | N | N   | N/A | nonWnt/SHH | P | 40% | M0 | SRMB (CCHE 3-1-2008)  |
| CCHE_Med_081 | F | Classic               | N | 7%  | P   | SHH        | P | 40% | M1 | InfMB (CCHE 3-1-2008) |
| CCHE_Med_082 | F | Desmoplastic/Nodular  | N | 45% | N/A | SHH        | P | 35% | Mx | InfMB (CCHE 3-1-2008) |
| CCHE_Med_083 | F | Desmoplastic/Nodular  | N | 98% | N/A | SHH        | N | N   | M0 | HRMB (CCHE 3-1-2008)  |
| CCHE_Med_084 | F | Classic               | N | N   | N/A | nonWnt/SHH | P | N   | M0 | HRMB (CCHE 3-1-2008)  |
| CCHE_Med_085 | F | Classic               | N | N   | N/A | nonWnt/SHH | N | 1%  | M0 | InfMB (CCHE 3-1-2008) |
| CCHE_Med_086 | M | Large_Cell_Anaplastic | N | N   | N/A | nonWnt/SHH | P | 20% | M0 | HRMB (CCHE 3-1-2008)  |
| CCHE_Med_087 | M | Desmoplastic/Nodular  | N | N   | FWN | nonWnt/SHH | N | 8%  | M1 | HRMB (CCHE 3-1-2008)  |
| CCHE_Med_088 | F | Classic               | N | N   | N/A | nonWnt/SHH | N | N   | M1 | HRMB (CCHE 3-1-2008)  |
| CCHE_Med_089 | F | Classic               | N | N   | N/A | nonWnt/SHH | P | 5%  | M0 | SRMB (CCHE 3-1-2008)  |
| CCHE_Med_090 | M | Classic               | N | N   | N/A | nonWnt/SHH | N | N   | M3 | HRMB (CCHE 3-1-2008)  |
| CCHE_Med_091 | M | Large_Cell_Anaplastic | P | N   | N/A | Wnt        | P | 20% | M0 | HRMB (CCHE 3-1-2008)  |
| CCHE_Med_092 | M | Classic               | N | N   | N/A | nonWnt/SHH | N | N   | M3 | HRMB (CCHE 3-1-2008)  |
| CCHE_Med_093 | F | Classic               | N | N   | N/A | nonWnt/SHH | P | 10% | M0 | SRMB (CCHE 3-1-2008)  |
| CCHE_Med_094 | F | Large_Cell_Anaplastic | N | 90% | N/A | SHH        | P | 10% | M0 | HRMB (CCHE 3-1-2008)  |
| CCHE_Med_095 | F | Large_Cell_Anaplastic | N | N   | N/A | nonWnt/SHH | P | 10% | M1 | HRMB (CCHE 3-1-2008)  |
| CCHE_Med_096 | F | Large_Cell_Anaplastic | N | N   | N   | nonWnt/SHH | P | 55% | M1 | HRMB (CCHE 3-1-2008)  |
| CCHE_Med_097 | F | Classic               | N | N   | N/A | nonWnt/SHH | N | N   | M3 | HRMB (CCHE 3-1-2008)  |
| CCHE_Med_098 | M | Classic               | N | N   | N/A | nonWnt/SHH | N | N   | M0 | SRMB (CCHE 3-1-2008)  |
| CCHE_Med_099 | M | Desmoplastic/Nodular  | N | 60% | N/A | SHH        | N | 2%  | M0 | SRMB (CCHE 3-1-2008)  |
| CCHE_Med_100 | M | Classic               | N | 85% | N/A | SHH        | P | 5%  | M0 | SRMB (CCHE 3-1-2008)  |

FWN= Focal weak nuclear

**Supplementary Table 2**

|                       | <b>OS</b>      |            | <b>EFS</b>     |            |
|-----------------------|----------------|------------|----------------|------------|
|                       | <b>C-Index</b> | <b>AUC</b> | <b>C-Index</b> | <b>AUC</b> |
| 5 % Aggresomes        | 0.5            | 0.51       | 0.53           | 0.51       |
| 10 % Aggresomes       | 0.53           | 0.54       | 0.52           | 0.54       |
| 20 % Aggresomes       | 0.58           | 0.59       | 0.55           | 0.59       |
| 30 % Aggresomes       | 0.5            | 0.5        | 0.52           | 0.52       |
| 60 % Aggresomes       | 0.52           | 0.53       | 0.5            | 0.51       |
| MS                    | 0.62           | 0.62       | 0.62           | 0.62       |
| WNT                   | 0.58           | 0.51       | 0.58           | 0.51       |
| SHH                   | 0.65           | 0.65       | 0.56           | 0.57       |
| non-WNT/non-SHH       | 0.62           | 0.64       | 0.60           | 0.62       |
| ≥ 20% Aggresomes + MS | 0.76           | 0.79       | 0.77           | 0.79       |
| < 20 Aggresomes + MS  | 0.60           | 0.62       | 0.59           | 0.60       |

**Supplementary Table 3**

| <b>Antibody</b>               | <b>Manufacturer (catalog no.)</b>           | <b>Application</b> | <b>Dilution</b> | <b>Localization</b>             | <b>Target</b>                |
|-------------------------------|---------------------------------------------|--------------------|-----------------|---------------------------------|------------------------------|
| $\beta$ -catenin              | Dako (IS702)                                | IHC                | 1:100           | Nuclear                         | WNT subgroup                 |
| GAB1                          | GeneTex (GTX111253)                         | IHC                | 1:100           | Cytoplasmic $\pm$<br>membranous | SHH subgroup                 |
| YAP1                          | Santa Cruz Biotechnology (G-6; sc-376830)   | IHC                | 1:100           | Cytoplasmic                     | Confirm WNT, SHH<br>subgroup |
| Vimentin                      | Ventana (790-2917)                          | IHC                | 1:100           | Cytoplasmic                     | Aggresomes                   |
| Vimentin                      | Abcam (ab8978)                              | IF                 | 1:50            | Cytoplasmic                     | Aggresomes                   |
| Secondary goat<br>anti-rabbit | Cell Signaling Technology (Alexa Fluor 488) | IF                 | 1:500           |                                 |                              |
| HDAC6                         | Cell Signaling Technology (7558)            | IF                 | 1:200           | Cytoplasmic                     | HDAC6                        |
| Secondary goat<br>anti-mouse  | Cell Signaling Technology (AlexaFluor 555)  | IF                 | 1:500           |                                 |                              |

HDAC6 = histone deacetylase 6, IHC= Immunohistochemistry, IF= Immunofluorescence
